# Supplementary material for: Doxycycline inhibits experimental cerebral malaria by reducing inflammatory immune reactions and tissue-degrading mediators
Source: PubMed Central journal article supplement (PMC5811026; doi:10.1371/journal.pone.0192717), 2018-02-13

S1 Fig

**A**

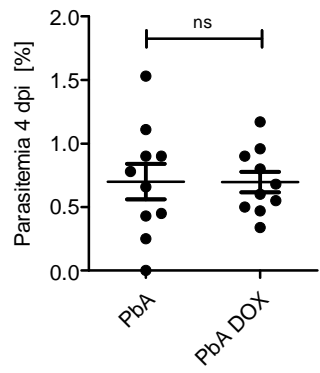

**B**

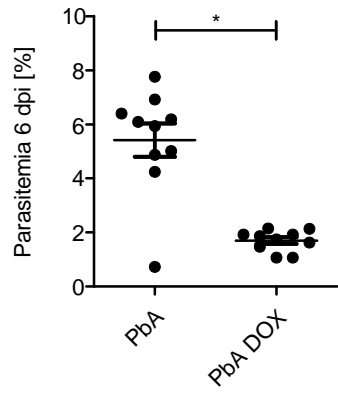

**C**

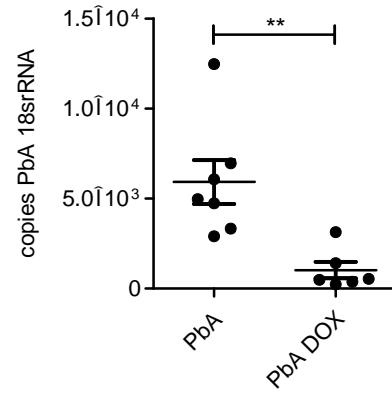

**D**

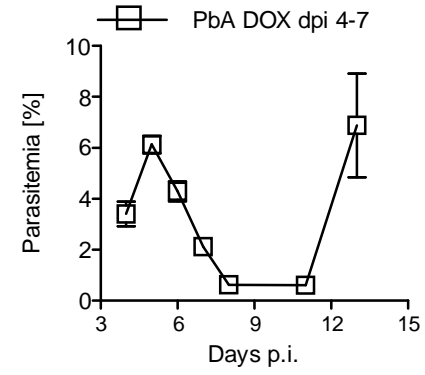

**E**

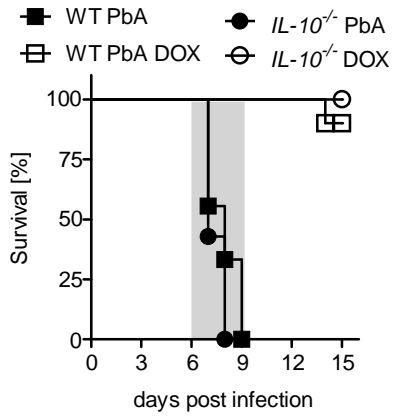

Supplement: pone.0192717.s001.pdf [file pone.0192717.s001.pdf]
