# Supplementary material for: Doxycycline inhibits experimental cerebral malaria by reducing inflammatory immune reactions and tissue-degrading mediators
Source: PubMed Central journal article supplement (PMC5811026; doi:10.1371/journal.pone.0192717), 2018-02-13

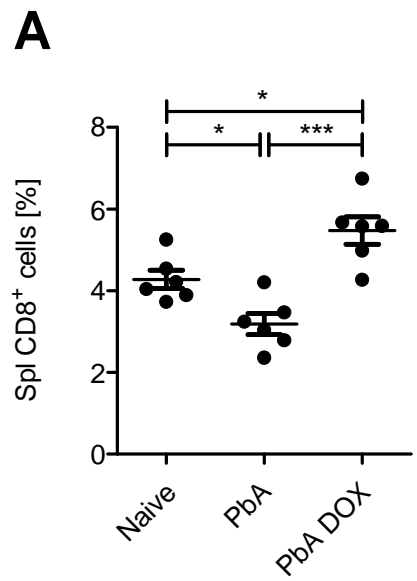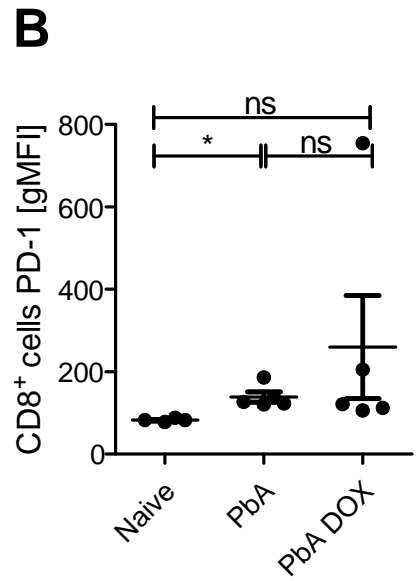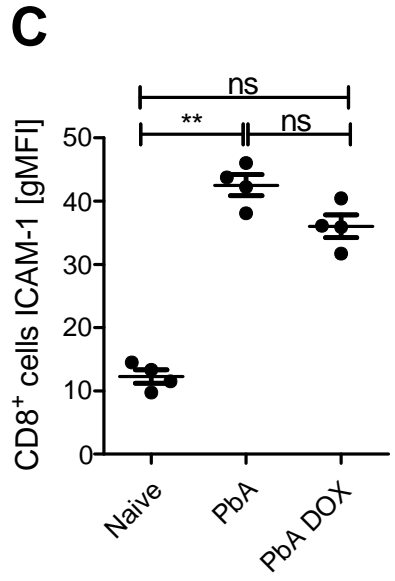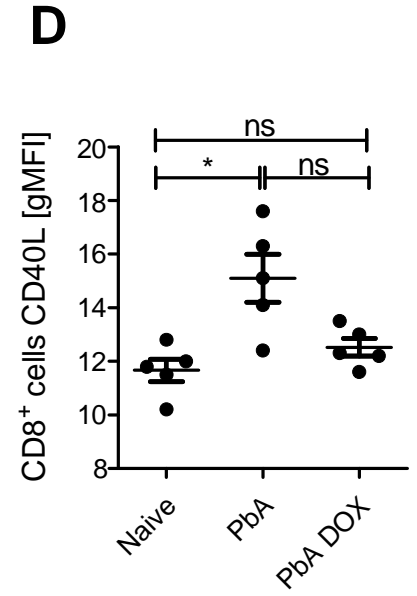

Supplement: pone.0192717.s003.pdf [file pone.0192717.s003.pdf]
