# Supplementary material for: Doxycycline inhibits experimental cerebral malaria by reducing inflammatory immune reactions and tissue-degrading mediators
Source: PubMed Central journal article supplement (PMC5811026; doi:10.1371/journal.pone.0192717), 2018-02-13
Supplement: pone.0192717.s005.pdf [file pone.0192717.s005.pdf]

S1 Table

| Gene     | Fold change (p-value, adjusted p-value) |                         |                       | Gene    | Fold change (p-value, adjusted p-value) |                         |                       |
|----------|-----------------------------------------|-------------------------|-----------------------|---------|-----------------------------------------|-------------------------|-----------------------|
|          | Naive vs. PbA                           | Naive vs. PbA DOX d4-d6 | PbA vs. PbA DOX d4-d6 |         | Naive vs. PbA                           | Naive vs. PbA DOX d4-d6 | PbA vs. PbA DOX d4-d6 |
| Ccl2     | 76,40                                   | 10,77                   | -7,09 (0,021, 0,160)  | Nppb    | 1,25                                    | -1,23                   | -1,53 (0,083, 0,269)  |
| Sell     | 28,31                                   | 9,71                    | -2,92 (0,021, 0,160)  | Thbd    | 1,22                                    | 1,02                    | -1,20 (0,248, 0,417)  |
| Cxcl2    | 24,60                                   | 4,64                    | -5,30 (0,021, 0,160)  | Agt     | 1,19                                    | 1,51                    | 1,27 (0,248, 0,417)   |
| Ccl5     | 16,69                                   | 6,27                    | -2,66 (0,021, 0,160)  | Rhob    | 1,15                                    | 1,07                    | -1,07 (0,386, 0,570)  |
| Sele     | 14,03                                   | 11,23                   | -1,25 (0,564, 0,728)  | Angpt1  | 1,14                                    | 1,51                    | 1,33 (0,083, 0,269)   |
| Vwf      | 12,84                                   | 81,27                   | 6,33 (0,386, 0,570)   | Ace     | 1,13                                    | 1,17                    | 1,04 (0,773, 0,832)   |
| Tnf      | 12,63                                   | 3,84                    | -3,29 (0,248, 0,417)  | Itgb1   | 1,10                                    | -1,02                   | -1,13 (0,021, 0,160)  |
| Selp     | 10,04                                   | 3,15                    | -3,19 (0,043, 0,214)  | Il11    | 1,10                                    | -1,14                   | -1,26 (1,000, 1,000)  |
| Icam1    | 8,71                                    | 4,78                    | -1,82 (0,021, 0,160)  | Bcl2l1  | 1,08                                    | 1,08                    | 1,00 (0,248, 0,417)   |
| Il6      | 7,33                                    | 1,63                    | -4,50 (0,021, 0,160)  | Tfpi    | 1,07                                    | 1,18                    | 1,11 (0,248, 0,417)   |
| Tnfsf10  | 5,48                                    | 6,59                    | 1,20 (0,564, 0,728)   | Flt1    | 1,03                                    | 1,63                    | 1,58 (0,043, 0,214)   |
| Cxcl1    | 5,18                                    | 2,07                    | -2,50 (0,248, 0,417)  | Itgav   | 1,01                                    | -1,01                   | -1,02 (0,564, 0,728)  |
| Mmp9     | 4,23                                    | 4,71                    | 1,11 (0,564, 0,728)   | Pdgfra  | 1,00                                    | 1,00                    | -1,00 (0,665, 0,832)  |
| Serpine1 | 3,59                                    | 1,39                    | -2,59 (0,083, 0,269)  | Bcl2    | -1,01                                   | 1,13                    | 1,14 (0,248, 0,417)   |
| Il1b     | 2,82                                    | 1,79                    | -1,57 (0,083, 0,269)  | Adam17  | -1,03                                   | -1,01                   | 1,02 (0,773, 0,832)   |
| Casp1    | 2,57                                    | 1,60                    | -1,60 (0,021, 0,160)  | Col18a1 | -1,05                                   | 1,00                    | 1,05 (1,000, 1,000)   |
| Cdh5     | 2,30                                    | 1,31                    | -1,76 (0,021, 0,160)  | Il3     | -1,05                                   | -1,18                   | -1,13 (0,248, 0,417)  |
| Fasl     | 2,25                                    | 1,46                    | -1,54 (0,149, 0,404)  | Casp3   | -1,05                                   | 1,23                    | 1,30 (0,248, 0,417)   |
| Fas      | 2,17                                    | 2,29                    | 1,05 (0,773, 0,832)   | Mmp1a   | -1,05                                   | -1,08                   | -1,03 (0,773, 0,832)  |
| Birc2    | 2,16                                    | 2,28                    | 1,06 (1,000, 1,000)   | Ednra   | -1,06                                   | 1,13                    | 1,19 (0,386, 0,570)   |
| Itga5    | 2,05                                    | 1,29                    | -1,59 (0,021, 0,160)  | Naip1   | -1,06                                   | -1,17                   | -1,10 (0,773, 0,832)  |
| Csf2     | 1,96                                    | 1,07                    | -1,83 (0,083, 0,269)  | Bax     | -1,10                                   | -1,17                   | -1,07 (0,248, 0,417)  |
| Tgfb1    | 1,96                                    | 1,33                    | -1,47 (0,021, 0,160)  | Sod1    | -1,10                                   | -2,00                   | -1,82 (1,000, 1,000)  |
| Nos3     | 1,95                                    | 1,50                    | -1,30 (0,248, 0,417)  | Npr1    | -1,11                                   | -1,17                   | -1,05 (0,773, 0,832)  |
| Pecam1   | 1,93                                    | 1,80                    | -1,07 (0,149, 0,404)  | Fgf1    | -1,12                                   | 1,01                    | 1,13 (0,248, 0,417)   |
| Thbs1    | 1,93                                    | 1,03                    | -1,86 (0,083, 0,269)  | Cx3cl1  | -1,12                                   | -1,13                   | -1,01 (0,773, 0,832)  |
| Edn2     | 1,75                                    | 1,04                    | -1,68 (0,248, 0,417)  | Anxa5   | -1,13                                   | -1,17                   | -1,03 (0,773, 0,832)  |
| Plg      | 1,71                                    | 1,21                    | -1,42 (0,149, 0,404)  | Plau    | -1,15                                   | -1,02                   | 1,13 (0,386, 0,570)   |
| Tnfaip3  | 1,70                                    | 1,12                    | -1,51 (0,043, 0,214)  | Il7     | -1,16                                   | 1,06                    | 1,23 (0,248, 0,417)   |
| Cxcr5    | 1,63                                    | 1,08                    | -1,51 (0,083, 0,269)  | Casp6   | -1,16                                   | -1,03                   | 1,13 (0,248, 0,417)   |
| Vcam1    | 1,62                                    | 2,08                    | 1,28 (0,149, 0,404)   | Kit     | -1,18                                   | -1,21                   | -1,03 (0,773, 0,832)  |
| Vegfa    | 1,50                                    | 1,83                    | 1,22 (0,248, 0,417)   | Cradd   | -1,20                                   | -1,08                   | 1,11 (0,248, 0,417)   |
| Ifnb1    | 1,47                                    | 1,08                    | -1,36 (0,083, 0,269)  | Ocln    | -1,24                                   | -1,08                   | 1,16 (0,386, 0,570)   |
| Selplg   | 1,42                                    | 1,00                    | -1,41 (0,043, 0,214)  | Itgb3   | -1,25                                   | -1,30                   | -1,04 (1,000, 1,000)  |
| Nos2     | 1,42                                    | 1,09                    | -1,30 (0,564, 0,728)  | Timp1   | -1,30                                   | -1,09                   | 1,18 (0,248, 0,417)   |
| Plat     | 1,37                                    | 1,15                    | -1,19 (1,000, 1,000)  | Cpb2    | -1,31                                   | -1,12                   | 1,17 (0,386, 0,570)   |
| Fn1      | 1,32                                    | 1,55                    | 1,18 (0,564, 0,728)   | Mmp2    | -1,37                                   | -1,39                   | -1,02 (0,773, 0,832)  |
| Edn1     | 1,31                                    | 1,39                    | 1,06 (0,773, 0,832)   | Agtr1a  | -1,50                                   | -1,02                   | 1,46 (0,149, 0,404)   |
| Cflar    | 1,31                                    | 1,30                    | -1,01 (0,564, 0,728)  | Tymp    | -1,54                                   | -1,69                   | -1,10 (0,564, 0,728)  |
| Ptgis    | 1,30                                    | 1,19                    | -1,09 (0,386, 0,570)  | Kdr     | -1,56                                   | 1,09                    | 1,71 (0,043, 0,214)   |
| Ripk1    | 1,30                                    | 1,13                    | -1,15 (0,083, 0,269)  | Tek     | -1,81                                   | 1,06                    | 1,92 (0,043, 0,214)   |
| Pgf      | 1,27                                    | -1,08                   | -1,37 (0,248, 0,417)  | Pf4     | -1,89                                   | -1,89                   | 1,00 (0,773, 0,832)   |
